# Supplementary material for: Adsorption Performance Analysis of Alternative Reactive Media for Remediation of Aquifers Affected by Heavy Metal Contamination
Source: Int J Environ Res Public Health. 2018 May 14;15(5):980. doi: 10.3390/ijerph15050980 (PMC5982019; doi:10.3390/ijerph15050980)
Supplement: Supplementary file 1 [file ijerph-15-00980-s001.pdf]

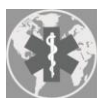

# Supplementary Materials: Adsorption Performance Analysis of Alternative Reactive Media for Remediation of Aquifers Affected by Heavy Metal Contamination

Antonio Molinari <sup>1,\*</sup>, Celia Margarita Mayacela Rojas <sup>1</sup>, Amerigo Beneduci <sup>2</sup>, Adalgisa Tavolaro <sup>3</sup>, Maria Fernanda Rivera Velasquez <sup>4</sup> and Carmine Fallico <sup>1</sup>

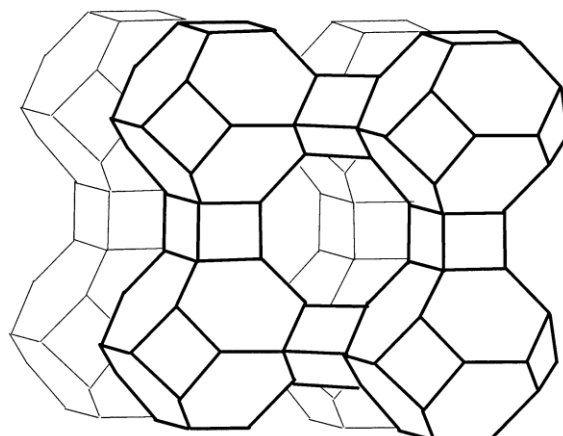

Figure S1. Schematic view of the structure of zeolite 4A.

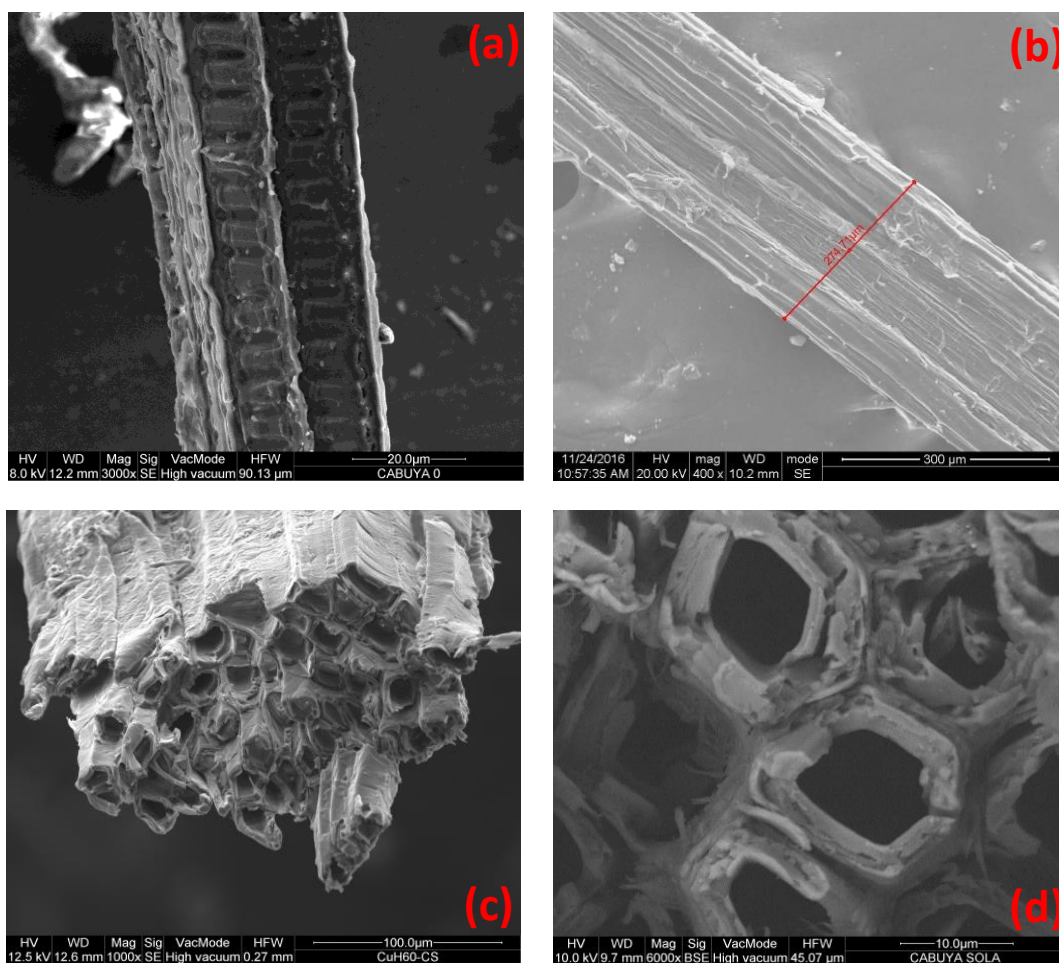

Figure S2. Scanning electron microscope (SEM) pictures of cabuya fibers in (a), (b) longitudinal view and in (c), (d) cross-sectional view with different zooms.

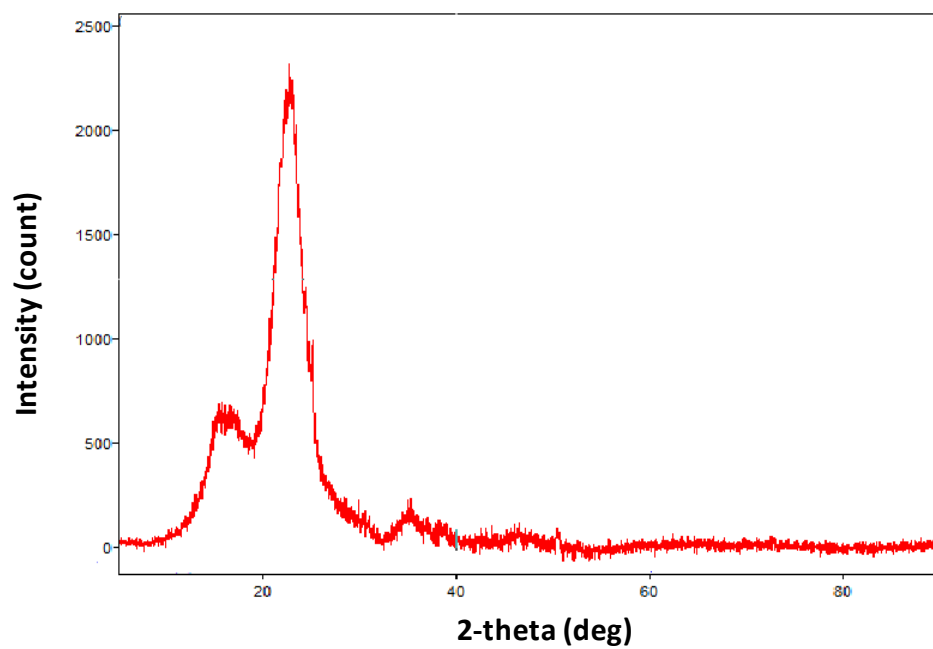

**Figure S3.** X-ray diffraction (XRD) pattern of cabuya fibers.

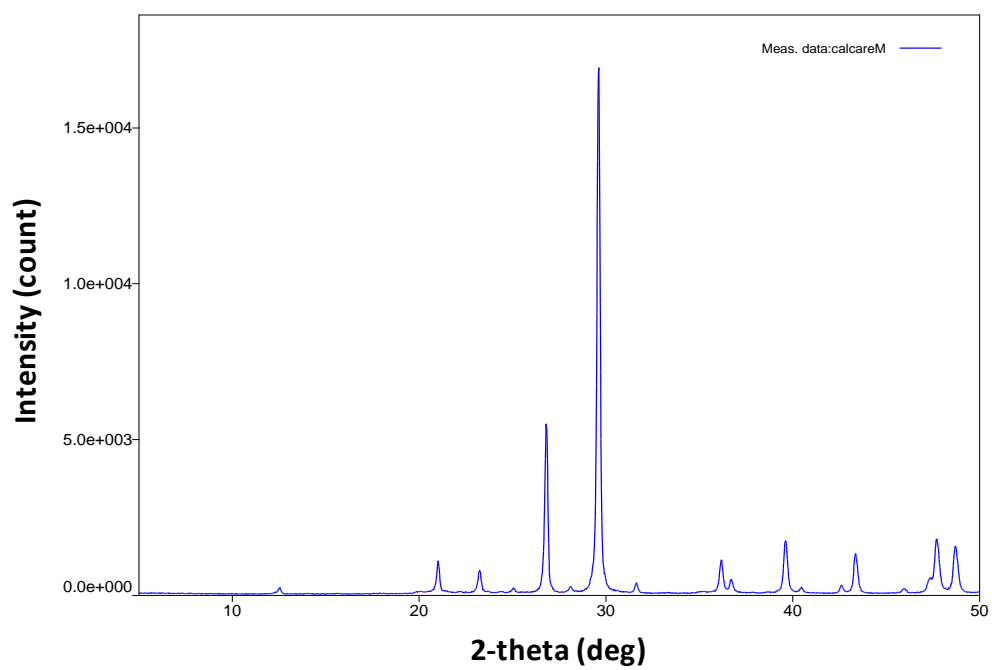

**Figure S4.** XRD pattern of limestone.

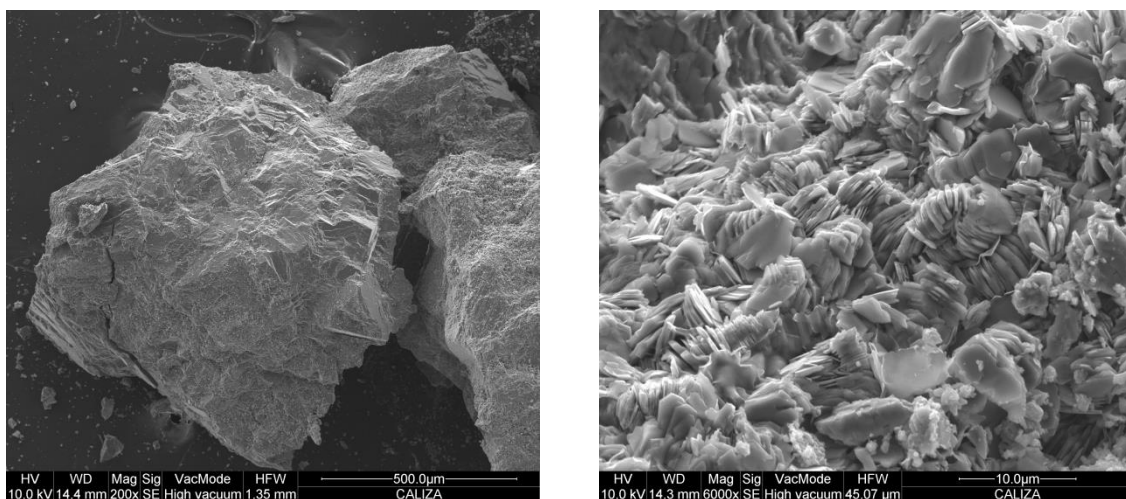

**Figure S5.** SEM pictures of Ecuador limestone with (a) 200x and (b) 6000x magnifications.

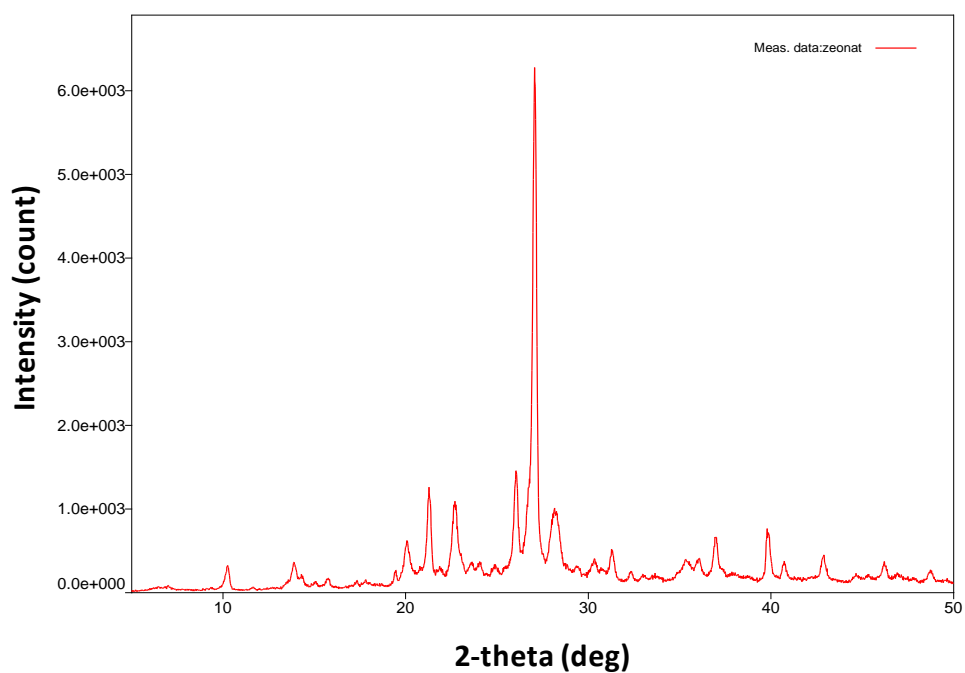

**Figure S6.** XRD pattern of natural zeolite.

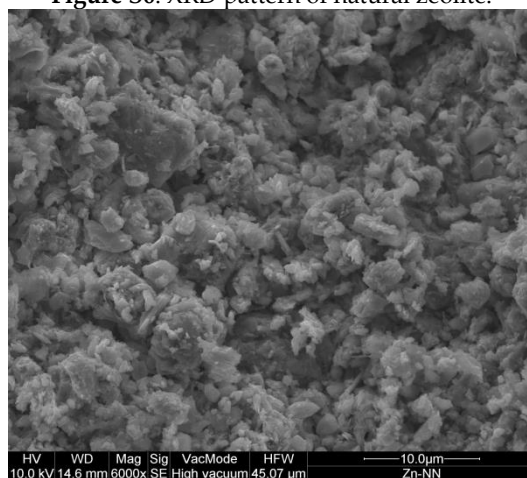

**Figure S7.** SEM picture of natural zeolite.

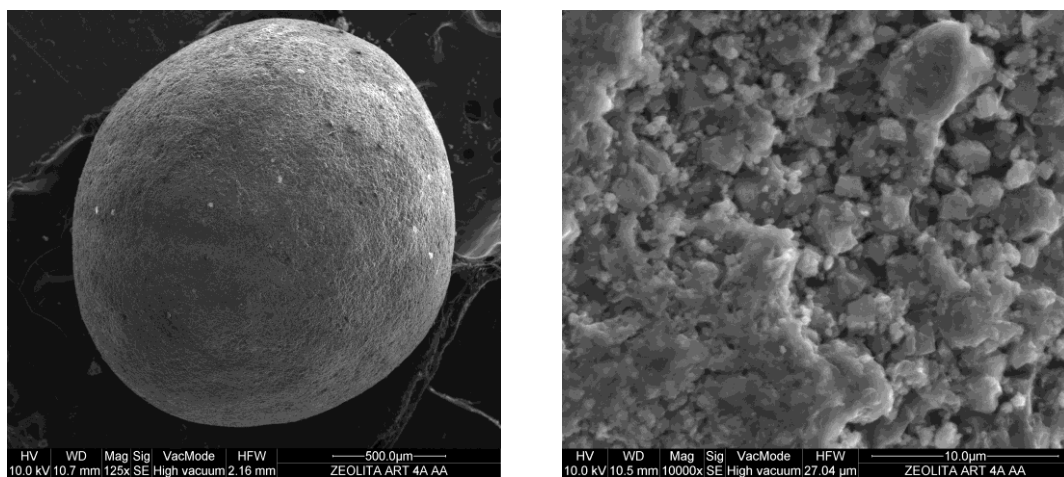

**Figure 8S.** SEM pictures of (a) a particle and (b) specific zoom on its surface of the synthetic zeolite.

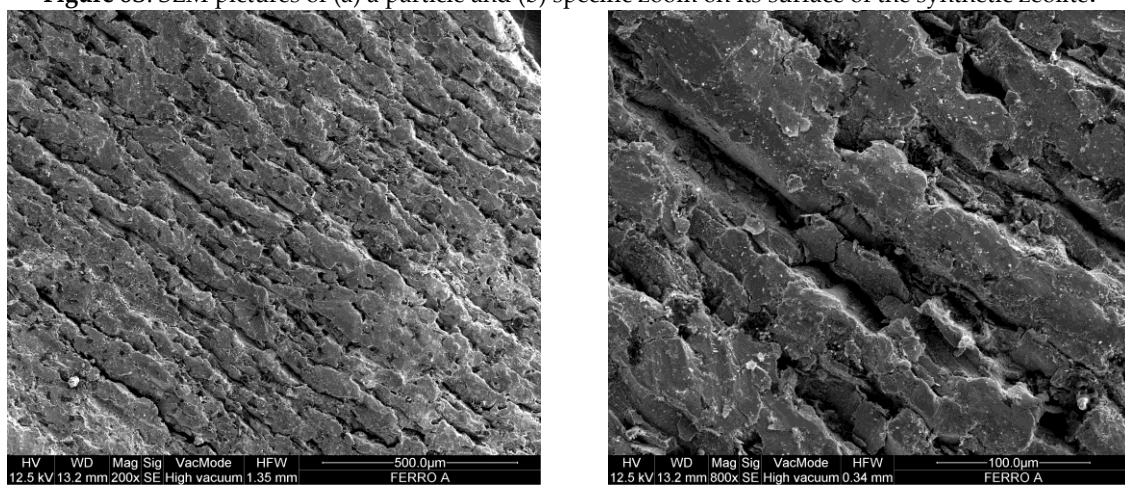

**Figure 9S.** SEM pictures of zero valent iron (ZVI) with two different magnifications.

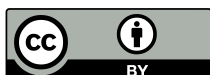

© 2017 by the authors. Submitted for possible open access publication under the terms and conditions of the Creative Commons Attribution (CC BY) license (<http://creativecommons.org/licenses/by/4.0/>).
